# Supplementary material for: Association of TP53 Alteration with Tissue Specificity and Patient Outcome of IDH1-Mutant Glioma
Source: Cells. 2021 Aug 17;10(8):2116. doi: 10.3390/cells10082116 (PMC8394030; doi:10.3390/cells10082116)
Supplement: Supplementary file 1 [file cells-10-02116-s001.zip › cells-1335464-supplementary/Supplementary Tables.xlsx]

## Sheet: Supplementary Table 1
Supplementary Table 1. Occurrence and frequency of IDH2 alteartion in human cancer
Dataset	Samples	R140/R172		Isolated		No Alteration
TCGA_PanCancer	10439	46	0.004	60	0.01	10333	0.99
MSK_Impact	10945	31	0.003	66	0.01	10847	0.99
Non-Redundant	23844	106	0.004	188	0.01	22913	0.96
Total	45228	184	0.004	314	0.01	44093	0.97

## Sheet: Supplementary Table 2
Supplementary Table 2. Mutual exclusivity of IDH2 and TP53 alterations in human cancer
Dataset	IDH2	TP53	Both	Neither	Log2 OR	p-Value	q-Value	Tendency
TCGA_PanCacner	79	3828	28	6504	-0.732	0.012	0.018	Mutual exclusivity
MSK_Impact	58	4584	37	6266	-0.198	0.295	0.295	Mutual exclusivity
Non-Redundant	182	4818	63	12779	-0.123	0.308	0.308	Mutual exclusivity

## Sheet: Supplementary Table 3
Supplementary Table 3. Low co-occurrence frequencies of specific IDH2 mutation and TP53 alteration in human cancer
Dataset	R140Q	R172K	R172S	R172G	R172M	R172W	R140L	R172T	R140W	R140G	R140/R172
TCGA_PanCancer	1/18 (6%)	1/17 (6%)	1/3 (33%)	0/2 (0%)	1/3 (33%)	0/2 (0%)	0/1 (0%)				4/46 (9%)
MSK_Impact		0/13 (0%)	0/3 (0%)	1/7 (14%)	0/1 (0%)	0/5 (0%)		0/1 (0%)	1/1 (100%)		2/31 (6%)
Non-Redundant	4/72 (6%)	1/21 (5%)	0/4 (0%)	0/1 (0%)	0/1 (0%)		0/5 (0%)			0/1 (0%)	5/105 (5%)
Total	5/90 (6%)	2/51 (4%)	1/10 (10%)	1/10 (10%)	1/5 (20%)	0/7 (0%)	0/6 (0%)	0/1 (0%)	1/1 (100%)	0/1 (0%)	11/182 (6%)

## Sheet: Supplementary Table 4
Supplementary Table 4. Gliomas are the predominant cancer type harboring co-occurrence of specific IDH1 mutation and TP53 alteration in TCGA_PanCancer
Cancer Type	R132H	R132C	R132G	R132S	R132L	R132	% of Total
LGG	199/359 (55%)	14/17 (82%)	11/11 (100%)	9/9 (100%)		233/396 (59%)	0.882576
GBM	21/22 (95%)	1/1 (100%)	2/2 (100%)			24/25 (96%)	0.0909091
SKCM		2/15 (13%)				2/15 (13%)	0.00757576
LUAD		1/1 (100%)			1/1 (100%)	2/2 (100%)	0.00757576
LIHC		1/3 (33%)	0/1 (0%)			1/4 (25%)	0.00378788
CHOL		1/4 (25%)		0/1 (0%)		1/5 (20%)	0.00378788
SARC		1/1 (100%)				1/1 (100%)	0.00378788
LAML	0/5 (0%)	0/12 (0%)	0/1 (0%)	0/1 (0%)		0/19 (0%)	0
PRAD	0/1 (0%)	0/2 (0%)	0/1 (0%)			0/4 (0%)	0
BLCA	0/1 (0%)	0/1 (0%)				0/2 (0%)	0
BRCA	0/1 (0%)	0/1 (0%)				0/2 (0%)	0
COADREAD		0/1 (0%)				0/1 (0%)	0
PCPG		0/1 (0%)				0/1 (0%)	0
THYM		0/1 (0%)				0/1 (0%)	0
Co-occurrence of specific IDH1 mutation and TP53 alteration is expressed as a percentage of total count of specific IDH1 mutation in each cancer type.

## Sheet: Supplementary Table 5
Supplementary Table 5. Gliomas of various histological types constitute the predominant cancer type harboring co-occurrence of specific IDH1 mutation and TP53 alteration in MSK_Impact
Cancer Type	R132H	R132C	R132G	R132S	R132L	R132I	R132	% of Total
Anaplastic Astrocytoma	34/35 (97%)	3/3/ (100%)	1/1 (100%)	1/1 (100%)	1/1 (100%)		40/41 (98%)	0.34188
Astrocytoma	21/21 (100%)	1/1 (100%)	1/1 (100%)	1/1 (100%)			24/24 (100%)	0.205128
Glioblastoma Multiforme	16/18 (89%)	2/2 (100%)	1/1 (100%)				19/21 (90%)	0.162393
Anaplastic Oligoastrocytoma	10/13 (77%)		1/1 (100%)				11/14 (79%)	0.0940171
Low-Grade Glioma, NOS	2/3 (67%)						2/3 (67%)	0.017094
High-Grade Glioma, NOS	1/2 (50%)			0/1 (0%)			1/3 (33%)	0.00854701
Oligoastrocytoma	1/3 (33%)		0/1 (0%)				1/4 (25%)	0.00854701
Anaplastic Oligodendroglioma	2/35 (6%)						2/35 (6%)	0.017094
Oligodendroglioma	1/32 (3%)						1/32 (3%)	0.00854701
Diffuse Intrinsic Pontine Glioma				1/1 (100%)			1/1 (100%)	0.00854701
Intrahepatic Cholangiocarcinoma		3/27 (11%)	0/1 (0%)		0/3 (0%)		3/31 (10%)	0.025641
Cholangiocarcinoma		1/10 (10%)	0/1 (0%)		0/2 (0%)		1/13 (8%)	0.00854701
Lung Adenocarcinoma		3/5 (60%)	1/1 (100%)				4/6 (67%)	0.034188
Chondrosarcoma	0/1 (0%)	1/2 (50%)	0/1 (0%)			0/1 (0%)	1/5 (20%)	0.00854701
Astroblastoma	1/1 (100%)						1/1 (100%)	0.00854701
Adenoid Cystic Carcinoma	1/1 (100%)						1/1 (100%)	0.00854701
Myxoid Chondrosarcoma		1/1 (100%)					1/1 (100%)	0.00854701
Small Bowel Cancer		1/1 (100%)					1/1 (100%)	0.00854701
Dedifferentiated Chondrosarcoma					1/1 (100%)		1/1 (100%)	0.00854701
Cutaneous Melanoma		1/7 (14%)					1/7 (14%)	0.00854701
Prostate Adenocarcinoma	0/2 (0%)	0/3 (0%)					0/5 (0%)	0
Extrahepatic Cholangiocarcinoma		0/3 (0%)					0/3 (0%)	0
Pancreatic Adenocarcinoma	0/1 (0%)						0/1 (0%)	0
Acinar Cell Carcinoma of the Pancreas		0/1 (0%)					0/1 (0%)	0
Colon Adenocarcinoma		0/1 (0%)					0/1 (0%)	0
Breast Invasive Ductal Carcinoma		0/1 (0%)					0/1 (0%)	0
Melanoma of Unknown Primary		0/1 (0%)					0/1 (0%)	0
Mixed Germ Cell Tumor		0/1 (0%)					0/1 (0%)	0
Medullary Thyroid Cancer					0/1 (0%)		0/1 (0%)	0
Co-occurrence of specific IDH1 mutation and TP53 alteration is expressed as a percentage of total count of specific IDH1 mutation in each cancer type.
NOS: Not Otherwise Specified

## Sheet: Supplementary Table 6
Supplementary Table 6. Gliomas of different studies collectively constitute the predominant cancer type harboring co-occurrence of specific IDH1 mutation and TP53 alteration in Non-Redundant
Cancer Type	R132H	R132C	R132G	R132L	R132S	R132	% of Total
lgg_ucsf	49/55 (89%)	4/4 (100%)	2/2 (100%)			55/61 (90%)	0.617978
glioma_msk	17/20 (85%)	2/2 (100%)			0/2 (0%)	19/24 (79%)	0.213483
pediatric_dkfz	5/6 (83%)	0/1 (0%)				5/7 (71)	0.0561798
aml_ohsu	0/17 (0%)	2/27 (7%)	2/3 (67%)	0/2 (0%)	0/5 (0%)	4/54 (7%)	0.0449438
ampca_bcm	1/1 (100%)					1/1 (100%)	0.011236
metastatic_mich		1/3 (33%)	0/1 (0%)	0/1 (0%)		1/5 (20%)	0.011236
summit	1/1 (100%)					1/1 (100%)	0.011236
bcc_unige		1/1 (100%)				1/1 (100%)	0.011236
acc	1/6 (17%)	0/2 (0%)		0/1 (0%)		1/9 (11%)	0.011236
gbm_columbia	0/3 (0%)		1/1 (100%)			1/4 (25%)	0.011236
prad_broad	0/2 (0%)					0/2 (0%)	0
prostate_dkfz	0/1 (0%)		0/1 (0%)			0/2 (0%)	0
acyc_mskcc	0/1 (0%)					0/1 (0%)	0
mpn_cimr	0/1 (0%)					0/1 (0%)	0
luad_broad	0/1 (0%)					0/1 (0%)	0
mnm_washu		0/8 (0%)				0/8 (0%)	0
mel_dfci		0/5 (0%)				0/5 (0%)	0
ihch_smmu		0/4 (0%)		0/1 (0%)		0/5 (0%)	0
chol_jhu		0/2 (0%)	0/1 (0%)		0/1 (0%)	0/4 (0%)	0
mixed_allen		0/3 (0%)				0/3 (0%)	0
chol_nccs		0/3 (0%)				0/3 (0%)	0
mm_broad		0/2 (0%)			0/1 (0%)	0/3 (0%)	0
coadread_dfci		0/2 (0%)				0/2 (0%)	0
skcm_broad		0/2 (0%)				0/2 (0%)	0
skcm_mskcc		0/1 (0%)				0/1 (0%)	0
all_phase2_target		0/1 (0%)				0/1 (0%)	0
mixed_pipseq		0/1 (0%)				0/1 (0%)	0
skcm_vanderbilt_mskcc		0/1 (0%)				0/1 (0%)	0
mbl_broad		0/1 (0%)				0/1 (0%)	0
mds_tokyo		0/1 (0%)				0/1 (0%)	0
lihc_amc_prv				0/1 (0%)		0/1 (0%)	0
luad_oncosg				0/1 (0%)		0/1 (0%)	0
Co-occurrence of specific IDH1 mutation and TP53 alteration is expressed as a percentage of total count of specific IDH1 mutation in each cancer type.

## Sheet: Supplementary Table 7
Supplementary Table 7. Multivariate Cox proportaional hazards analysis of TP53 status in TCGA-LGG dataset
	Hazards Ratio	95% CI		p value
TP53 no alteration vs. altered	1.809	1.327	3.15	0.001
IDH1 wildtype vs. R132	0.543	0.413	0.619	<0.001
Age < 40 vs. > 60 years old	6.031	3.936	11.138	<0.001
Male vs. Female	0.832	0.604	1.25	0.449
Oligodendroglioma vs. Astrocytoma	1.203	0.882	2.162	0.158

## Sheet: Supplementary Table 8
Supplementary Table 8. Multivariate Cox proportional hazards analysis of TP53 status in the IDH1-wildtype subgroup of TCGA-LGG dataset
	Hazards Ratio	95% CI		p value
TP53 no alteration vs. altered	2.572	1.378	4.802	0.003
Age < 40 vs. > 60 years old	9.051	3.173	25.816	<0.001
Male vs. Female	0.759	0.421	1.371	0.361
Oligodendroglioma vs. Astrocytoma	2.101	1.034	4.269	0.04
